# Supplementary material for: Structural Characterization of the Low-Molecular-Weight Heparin Dalteparin by Combining Different Analytical Strategies
Source: PubMed Central journal article supplement (PMC6152074; doi:10.3390/molecules22071051), 2017-06-24
Supplement: molecules-22-01051-s001.pdf [file molecules-22-01051-s001.pdf]

## SUPPLEMENTARY MATERIAL

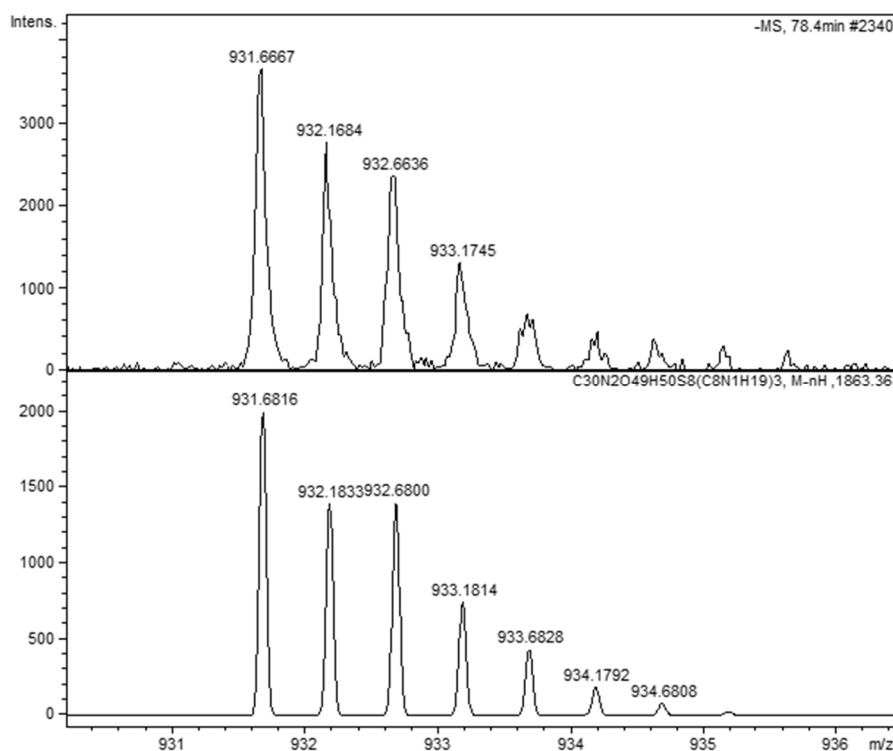

**Figure S1.** LC-MS analysis of dalteparin Frag-5 following heparinase III digestion: confirmation of A5,8,0-aM.ol composition by ICR-FT-MS.

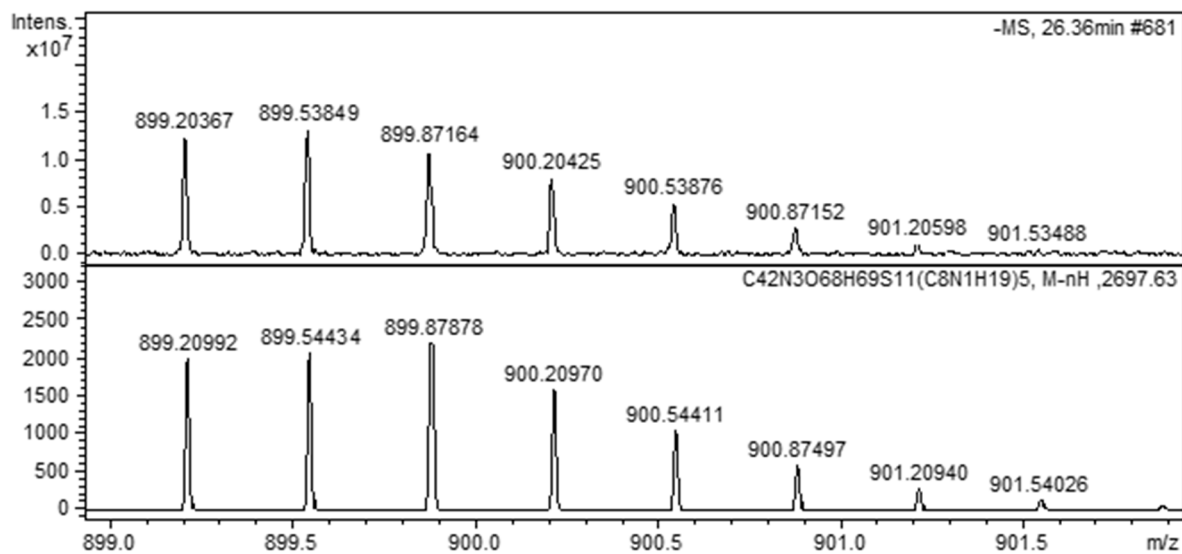

**Figure S2.** LC-MS analysis of dalteparin Frag-5 following heparinase III digestion: confirmation of A7,11,0-aM.ol composition by ICR-FT-MS.

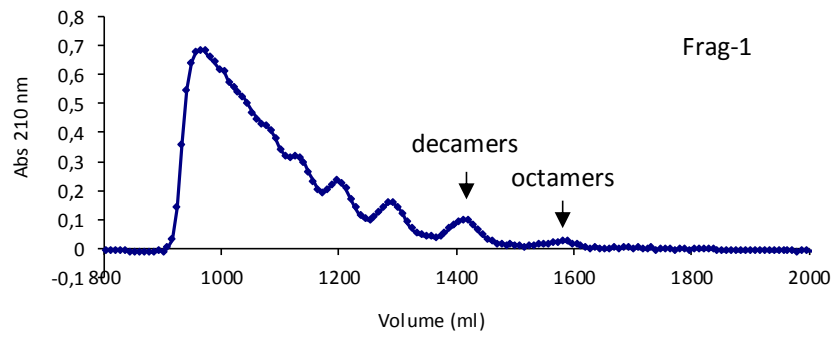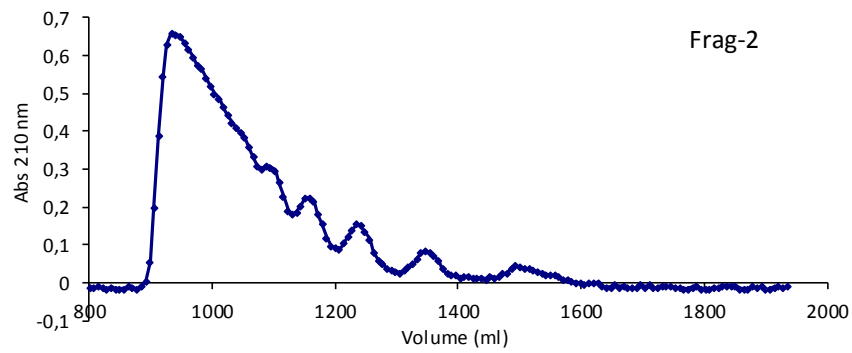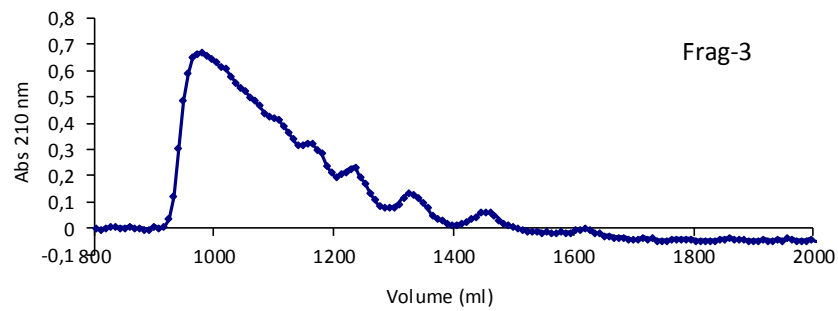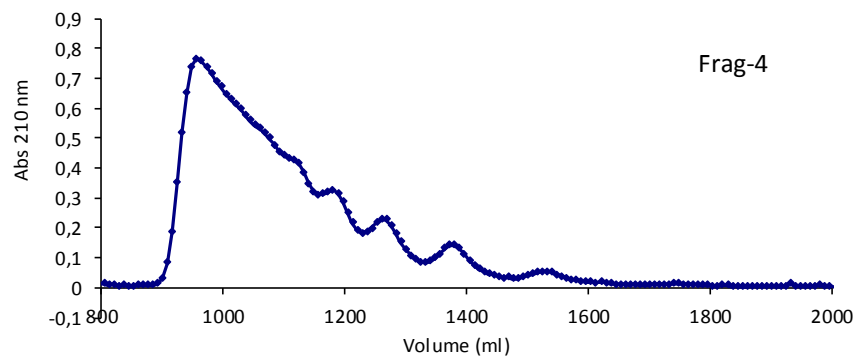

**Figure S3.** Elution profile on Biogel P6 of dalteparin samples Frag-1 – Frag-4.

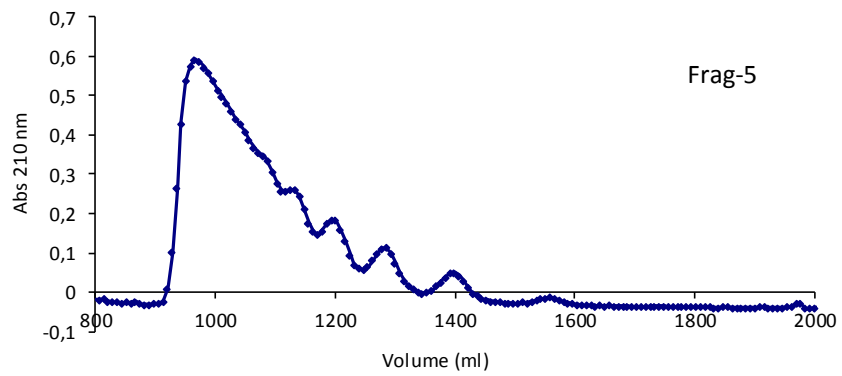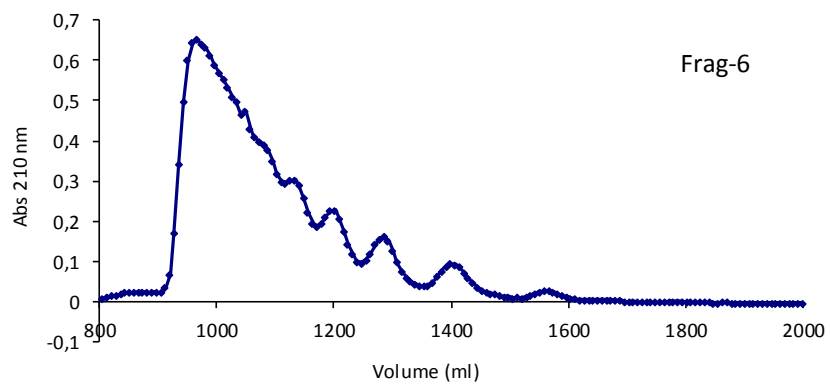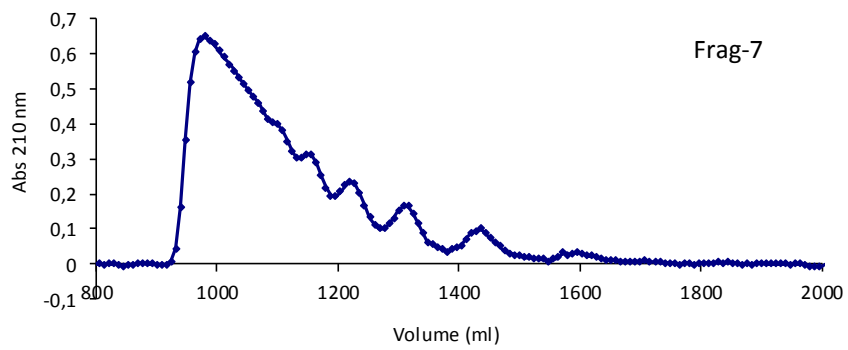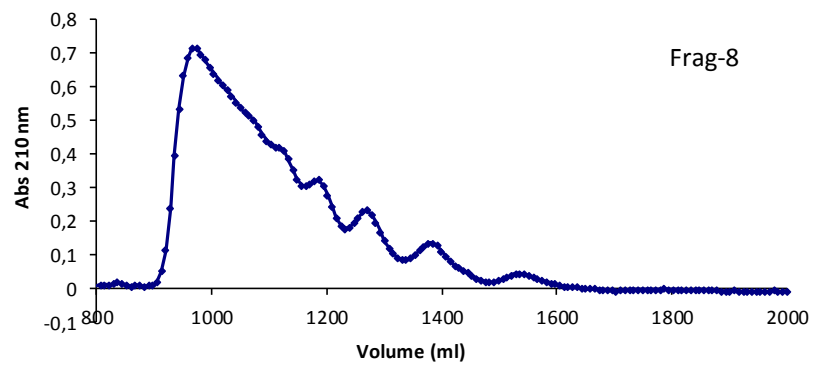

**Figure S4.** Elution profile on Biogel P6 of dalteparin samples Frag-5 – Frag-8.

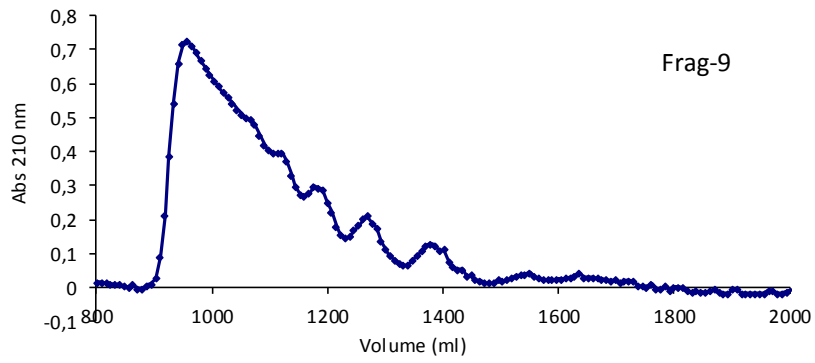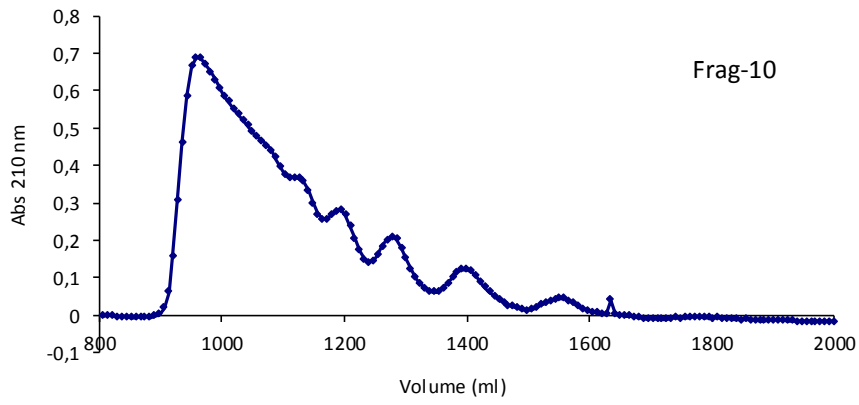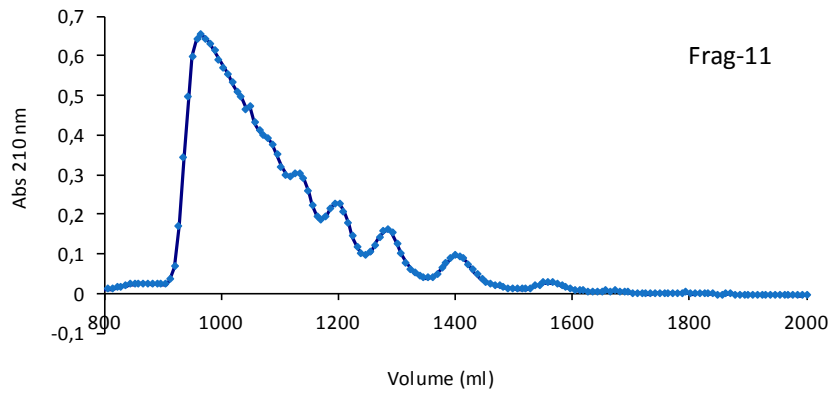

**Figure S5.** Elution profile on Biogel P6 of dalteparin samples Frag-9 – Frag-11.

**Table S1.** Oligosaccharide family identified by LC-MS chain mapping in all the analysed dalteparin samples Frag-1 – Frag-11: mass signal assignment.

| Chromatographic Peak Number | Main signal (m/z) | Signal charge (z) | Pentylamine adducts | Mw          | Mass signals assignment |
|-----------------------------|-------------------|-------------------|---------------------|-------------|-------------------------|
| 1                           | 912.0             | -2                | 4                   | 1478        | A5,8,0-aM.ol            |
| 2                           | 1000.0            | -2                | 4                   | 1654        | U6,8,0-aM.ol            |
| 3                           | 819.5             | -3                | 4                   | 2113        | U8,9,1-aM.ol            |
| 4                           | 831.5             | -3                | 6                   | 1975        | A7,10,0-aM.ol           |
| 5                           | 831.5             | -3                | 6                   | 1975        | A7,10,0-aM.ol           |
| 6                           | 832.0 + 827.0     | -3                | 4                   | 2151 + 2136 | U8,10,0-aM.ol + Rc      |
| 7                           | 887.5             | -3                | 5                   | 2231        | U8,11,0-aM.ol           |
| 8                           | 829.0             | -3                | 3                   | 2229        | U8,11,0-aM              |
| 9                           | 887.5             | -3                | 5                   | 2231        | U8,11,0-aM.ol           |
|                             | + 1099.0          | -3                | 7                   | 2690        | + U10,12,1-aM.ol        |
| 10                          | 887.5             | -3                | 5                   | 2231        | U8,11,0-aM.ol           |
|                             | + 1099.0          | -3                | 7                   | 2690        | + U10,12,1-aM.ol        |
| 11                          | 1082.5            | -3                | 6                   | 2728        | U10,13,0-aM.ol          |
| 12                          | 1082.5            | -3                | 6                   | 2728        | U10,13,0-aM.ol          |
| 13                          | 1167.0            | -3                | 8                   | 2808        | U10,14,0-aM.ol          |
| 14                          | 1166.5            | -3                | 8                   | 2806        | U10,14,0-aM             |
| 15                          | 1167.0            | -3                | 8                   | 2808        | U10,14,0-aM.ol          |
| 16                          | 1021.0 + 1017.5   | -4                | 9                   | 3305 + 3290 | U12,16,0-aM.ol +Rc      |
| 17                          | 1021.0 + 1017.5   | -4                | 9                   | 3305 + 3290 | U12,16,0-aM.ol +Rc      |
| 18                          | 1041.0            | -4                | 9                   | 3385        | U12,17,0-aM.ol          |
| 19                          | 1041.0            | -4                | 9                   | 3385        | U12,17,0-aM.ol          |
| 20                          | 1209.0 + 1205.3   | -4                | 11                  | 3882 + 3867 | U14,19,0-aM.ol + Rc     |
| 21                          | 1209.0 + 1205.3   | -4                | 11                  | 3882 + 3867 | U14,19,0-aM.ol + Rc     |
| 22                          | 1229.0            | -4                | 11                  | 3962        | U14,20,0-aM.ol          |
| 23                          | 1229.0            | -4                | 11                  | 3962        | U14,20,0-aM.ol          |

*Nomenclature of mass signals assignment: The letter preceding the numeric code represents the kind of non-reducing end residue: U (uronic acid) and A (glucosamine), followed by the number of monosaccharide residues, sulfate groups, and N-acetyl groups, respectively. the Δ symbol represents the unsaturation on uronic acid produced by the enzymatic digestion, while the a-M.ol symbol is added for the fragment residues terminating with 2,5-anhydro-D-mannitol.*

**Table S2.** Oligosaccharide fragments produced by heparinases I, II, III digestion observed in all the analysed dalteparin samples Frag-1 – Frag-11: mass signal assignment.

| Chromatographic Peak Number | Main signal (m/z) | Signal charge | Dibutylamine adducts | Mw     | Mass signal assignment                      | Structure identification by commercial disaccharide standards |
|-----------------------------|-------------------|---------------|----------------------|--------|---------------------------------------------|---------------------------------------------------------------|
| 1                           | 631.2             | -1            | -                    | 632.2  | $\Delta$ U-Gal-Gal-Xyl                      | -                                                             |
| 2                           | 378.1             | -1            | -                    | 379.1  | $\Delta$ U2,0,1                             | $\Delta$ U-A <sub>NAC</sub>                                   |
| 3                           | 718.2             | -1            | -                    | 719.2  | $\Delta$ U-Gal-Gal-Xyl-Ser                  | -                                                             |
| 4                           | 676.2             | -1            | -                    | 677.2  | $\Delta$ U-Gal-Gal-Xyl-COOH                 | -                                                             |
| 5                           | 689.2             | -1            | -                    | 690.2  | $\Delta$ U-Gal-Gal-Xyl-CH <sub>2</sub> COOH | -                                                             |
| 6                           | 458.0             | -1            | -                    | 459.0  | $\Delta$ U2,1,1                             | $\Delta$ U <sub>25</sub> -A <sub>NAC</sub>                    |
|                             | + 401.0           | -1            | -                    | 402.0  | + $\Delta$ U2,1,0-aM.ol                     | -                                                             |
| 7                           | 416.0             | -1            | -                    | 417.0  | $\Delta$ U2,1,0                             | $\Delta$ U-A <sub>NS</sub>                                    |
| 8                           | 514.0             | -1            | -                    | 515.0  | U2,2,0                                      | -                                                             |
| 9                           | 496.0             | -1            | -                    | 497.0  | $\Delta$ U2,2,0                             | $\Delta$ U-A <sub>NS,6S</sub>                                 |
| 10                          | 496.0             | -1            | -                    | 497.0  | $\Delta$ U2,2,0                             | $\Delta$ U <sub>25</sub> -A <sub>NS</sub>                     |
| 11                          | 481.0             | -1            | -                    | 482.0  | $\Delta$ U2,2,0-aM.ol                       | -                                                             |
| 12                          | 538.0             | -1            | -                    | 539.0  | $\Delta$ U2,2,1                             | $\Delta$ U <sub>25</sub> -A <sub>NAC,6S</sub>                 |
|                             | + 418.0           | -1            | -                    | 419.0  | + A*                                        | -                                                             |
| 13                          | 594.0             | -1            | -                    | 595.0  | U2,3,0                                      | -                                                             |
| 14                          | 576.0             | -1            | -                    | 577.0  | $\Delta$ U2,3,0                             | $\Delta$ U <sub>25</sub> -A <sub>NS,6S</sub>                  |
| 15                          | 477.0             | -2            | -                    | 956.0  | $\Delta$ U4,3,1                             | -                                                             |
| 16                          | 785.0             | -1            | 1                    | 657.0  | $\Delta$ U2,4,0                             | -                                                             |
| 17                          | 517.0             | -2            | -                    | 1036.0 | $\Delta$ U4,4,1                             | -                                                             |
| 18                          | 488.5             | -2            | -                    | 979.0  | $\Delta$ U4,4,0-aM.ol                       | -                                                             |
| 19                          | 488.5             | -2            | -                    | 979.0  | $\Delta$ U4,4,0-aM.ol                       | -                                                             |
| 20                          | 536.0             | -2            | -                    | 1074.0 | $\Delta$ U4,5,0                             | -                                                             |
| 21                          | 621.5             | -2            | 1                    | 1116.0 | $\Delta$ U4,5,1                             | -                                                             |
| 22                          | 593.0             | -2            | 1                    | 1059.0 | $\Delta$ U4,5,0-aM.ol                       | -                                                             |
| 23                          | 887.2             | -2            | 2                    | 1518.0 | $\Delta$ U6,6,1-aM.ol                       | -                                                             |

**Table S3.** Oligosaccharide fragments produced by heparinase III digestion observed in all the analysed dalteparin samples Frag-1 – Frag-11: mass signal assignment. (\*) In blue, species observed in the untreated sample too.

| Chromatographic Peak Number | Main signal (m/z) | Signal charge | Dibutylamine adducts | Mass signals assignment (*)                       |
|-----------------------------|-------------------|---------------|----------------------|---------------------------------------------------|
| 1                           | 321.0             | -1            | -                    | $\Delta$ U2,0,0-aM.ol                             |
|                             | 378.0             | -1            | -                    | $\Delta$ U2,0,1                                   |
| 2                           | 344.0             | -2            | -                    | $\Delta$ U-Gal-Gal-Xyl-CH <sub>2</sub> COOH       |
|                             | 587.0             | -1            | -                    | $\Delta$ U-Gal-Gal-Xyl-CH(CH <sub>2</sub> OH)COOH |
| 3                           | 458.0             | -1            | -                    | $\Delta$ U2,1,1                                   |
| 4                           | 401.0             | -1            | -                    | $\Delta$ U2,1,0-aM.ol                             |
|                             | 458.0             | -1            | -                    | $\Delta$ U2,1,1                                   |
| 5                           | 417.0             | -1            | -                    | $\Delta$ U2,1,0                                   |
|                             | 477.0             | -1            | -                    | U2,1,1                                            |
| 6                           | 497.0             | -1            | -                    | $\Delta$ U2,2,0                                   |
| 7                           | 482.0             | -1            | -                    | $\Delta$ U2,2,0-aM.ol                             |
|                             | 557.0             | -1            | -                    | U2,2,1                                            |
| 8                           | 437.0             | -2            | -                    | $\Delta$ U4,2,1                                   |
| 9                           | 594.0             | -1            | -                    | U2,3,0                                            |
| 10                          | 448.5             | -2            | -                    | $\Delta$ U4,3,0-aM.ol                             |
| 11                          | 477.0             | -2            | -                    | $\Delta$ U4,3,1                                   |
| 12                          | 488.5             | -2            | -                    | $\Delta$ U4,4,0-aM.ol                             |
| 13                          | 526.0             | -2            | -                    | U4,4,1                                            |
| 14                          | 537.5             | -2            | -                    | U4,5,0-aM.ol                                      |
| 15                          | 566.0             | -2            | -                    | U4,5,1                                            |
|                             | 725.5             | -2            | -                    | $\Delta$ U6,5,1                                   |
| 16                          | 765.5             | -2            | -                    | $\Delta$ U6,6,1                                   |
| 17                          | 887.0             | -2            | 2                    | $\Delta$ U6,6,1-aM.ol                             |
| 18                          | 943.5             | -2            | 2                    | U6,7,1                                            |
| 19                          | 906.0             | -2            | 2                    | $\Delta$ U6,7,0-aM.ol                             |
| 20                          | 931.5             | -2            | 3                    | A5,8,0-aMol                                       |
| 21                          | 1019.5            | -2            | 3                    | U6,8,0-aM.ol                                      |
| 22                          | 783.3             | -3            | 2                    | $\Delta$ U8,9,1-aM.ol                             |
| 23                          | 821.0             | -3            | 2                    | U8,10,1                                           |
| 24                          | 796.0             | -3            | 2                    | $\Delta$ U8,10,0-aM.ol                            |
| 25                          | 1413.9            | -2            | 6                    | A7,11,0-aM.ol                                     |
| 26                          | 871.6             | -3            | 3                    | U8,11,0-aM.ol                                     |
| 27                          | 1110.6            | -3            | 5                    | U10,12,1-aM.ol                                    |
| 28                          | 1123.3            | -3            | 5                    | U10,13,0-aM.ol                                    |
| 29                          | 1193.0            | -3            | 6                    | U10,14,0-aM.ol                                    |
| 30                          | 1445.0            | -3            | 8                    | U12,16,0-aM.ol                                    |
| 31                          | 1514.3            | -3            | 9                    | U12,17,0-aM.ol                                    |
| 32                          | 1766.5            | -3            | 11                   | U14,19,0-aM.ol                                    |
| 33                          | 1836.2            | -3            | 12                   | U14,20,0-aM.ol                                    |
| 34                          | 1521.0            | -4            | 12                   | U16,23,0-aM.ol                                    |
